# Supplementary material for: Sodium oligomannate therapeutically remodels gut microbiota and suppresses gut bacterial amino acids-shaped neuroinflammation to inhibit Alzheimer’s disease progression
Source: PubMed Central journal article supplement (PMC6796854; doi:10.1038/s41422-019-0216-x), 2019-09-06
Supplement: 41422_2019_216_MOESM2_ESM.pdf [file 41422_2019_216_MOESM2_ESM.pdf]

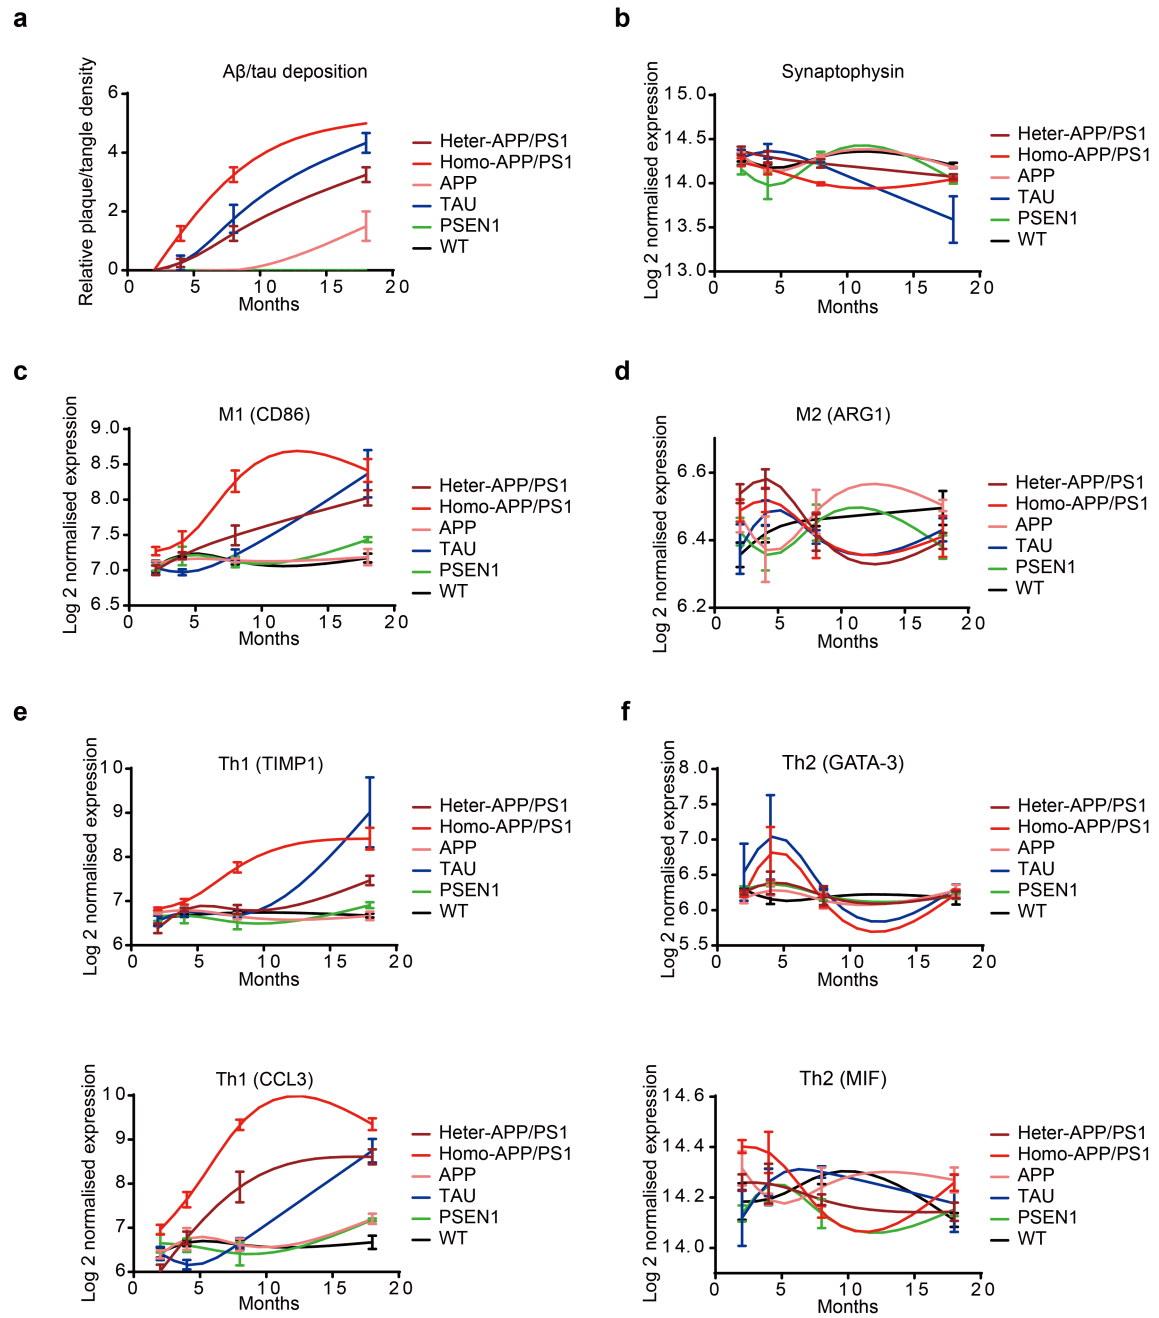

**Figure S2.** Changes in the hallmarks of AD in five animal models and wild-type (WT) mice at 2-, 4-, 8- and 18-month-old from the Mouseac database.

(a) Changes in relative densities of A $\beta$  plaque or tau neurofibrillary tangle (n = 4 for each group). The data are presented as the mean  $\pm$  standard error of the mean (mean  $\pm$  sem). Colours indicate different models; lines are fitted using a polynomial algorithm.

**(b)** Changes in  $\log_2$  normalized expression levels of synaptophysin ( $n = 4$  for each group). The data are presented as the mean  $\pm$  standard error of the mean (mean  $\pm$  sem). Colours indicate different models; lines are fitted using a polynomial algorithm.

**(c-d)** Changes in  $\log_2$  normalized expression levels of CD86 and ARG1, representing changes in M1 and M2 cell counts ( $n = 4$  for each group). The data are presented as the mean  $\pm$  standard error of the mean (mean  $\pm$  sem). Colours indicate different models; lines are fitted using a polynomial algorithm.

**(e-f)** Changes in  $\log_2$  normalized expression levels of TIPM, CCL3, GATA-3 and MIF, representing changes in Th1 and Th2 counts ( $n = 4$  for each group). The data are presented as the mean  $\pm$  standard error of the mean (mean  $\pm$  sem). Colours indicate different models; lines are fitted using a polynomial algorithm.
