# Supplementary material for: Sodium oligomannate therapeutically remodels gut microbiota and suppresses gut bacterial amino acids-shaped neuroinflammation to inhibit Alzheimer’s disease progression
Source: PubMed Central journal article supplement (PMC6796854; doi:10.1038/s41422-019-0216-x), 2019-09-06
Supplement: 41422_2019_216_MOESM4_ESM.pdf [file 41422_2019_216_MOESM4_ESM.pdf]

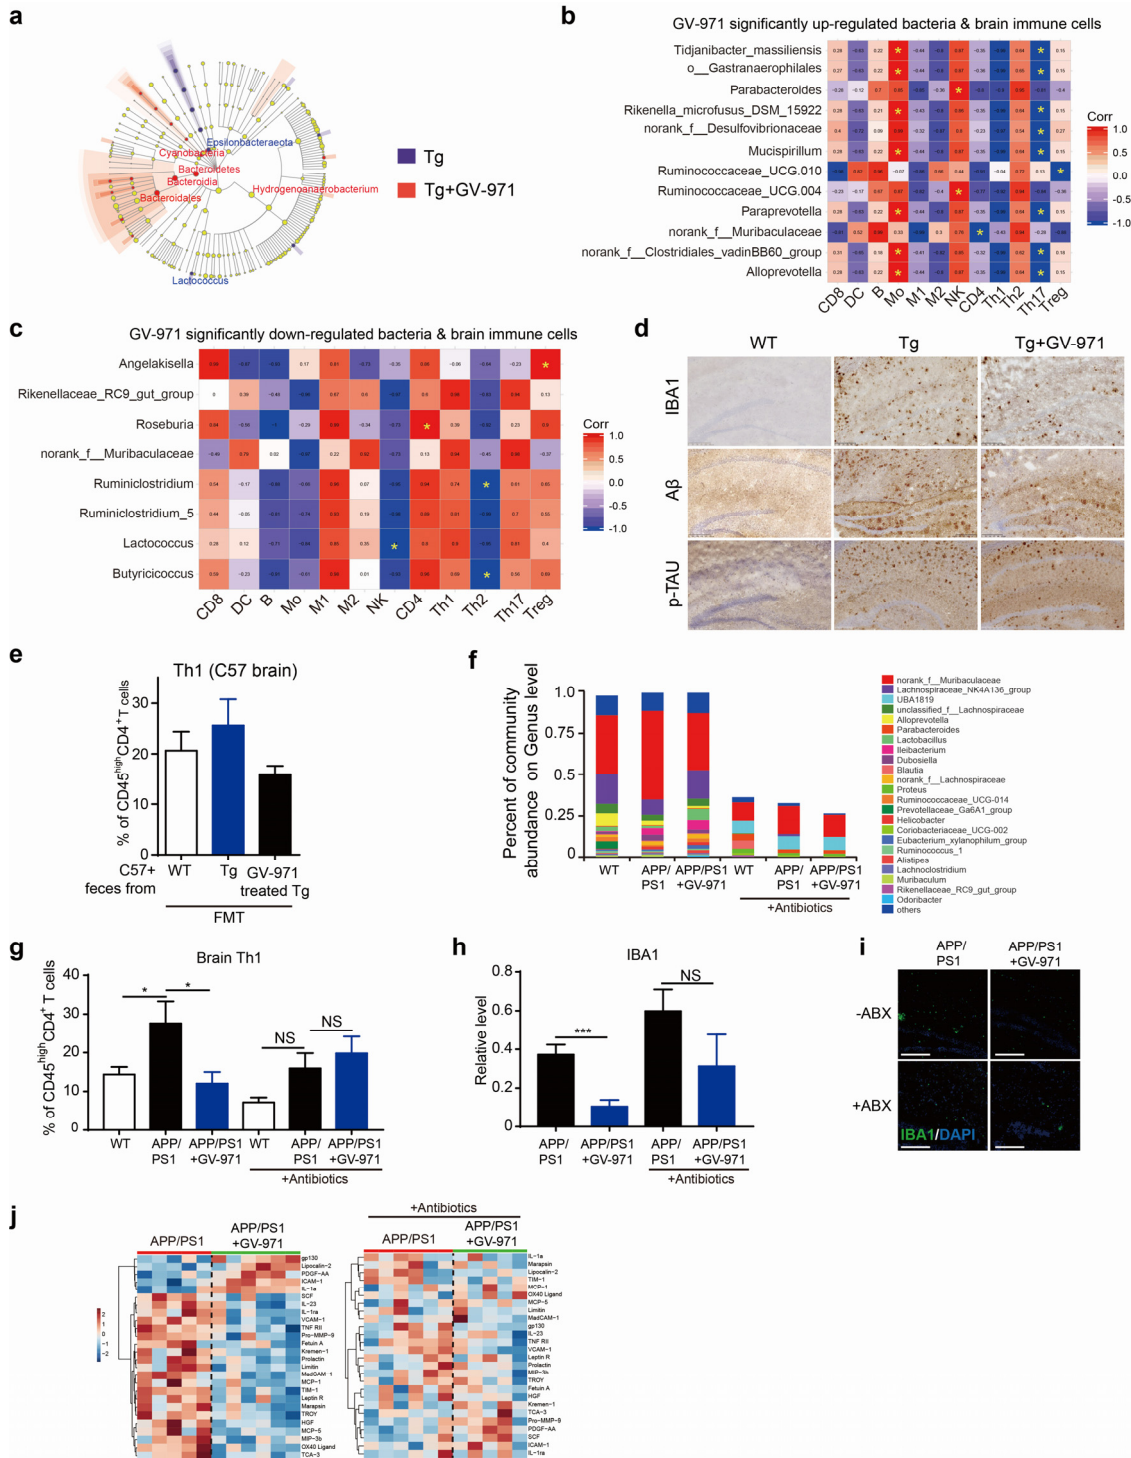

**Figure S4.**

**(a)** Cladogram of linear discriminant analysis effect size (LEfSe) analysis of the gut microbiome

composition of 7-month-old 5XFAD transgenic (Tg) mice treated orally with 100 mpk GV-971 (n=5-7). The phylum, class, order or genus level of represented bacteria with the highest discriminatory power of each group are labelled on the graph. Blue, bacteria enriched in 7-month-old Tg mice. Red, bacteria enriched in 7-month-old Tg mice that received 100 mpk GV-971. The inner to outer circles indicate different taxonomic levels (inner to outer: phylum, class, order, family and genus).

**(b-c)** Correlation of trend changes between the abundance of microbiota that are significantly up- (b) and down-regulated (c) by 100 mpk GV-971 and the frequency of brain immune cell subtypes in 5XFAD transgenic (Tg) mice at 7-month-old, represented at genus level. Related to Figure 4b. Squares in red (positive correlation) or blue (negative correlation) with a yellow asterisk (\*) indicate significant correlations with  $P < 0.05$  measured by the Pearson parametric correlation test, the numbers in each cell are correlation coefficient (see Methods). DC, dendritic cells; B, B cells; Mo: monocytes; NK, natural killer cells; Treg, T regulatory cells.

**(d)** Representative images of IBA1 staining, A $\beta$  deposition and Tau phosphorylation in the brain hippocampus of WT, Tg and GV-971-treated Tg. Scale bar represent 250  $\mu$ m. Positive signal was visualized using the substrate 3,3' diaminobenzidine (DAB) shown as dark brown.

**(e)** Effects of feces from WT, Tg and 100 mpk GV-971-treated Tg mice on the brain Th1 cell in the recipient C57 mice with A $\beta$  hippocampus injection (n = 4-5). The donor of the feces are all 7-month-old. The data are presented as the mean  $\pm$  standard error of the mean (mean  $\pm$  sem). FMT, fecal microbiota transplantation. C57, the C57BL/6 mice.

**(f)** Effects of antibiotic treatment (ampicillin (0.1 mg/mL), streptomycin (0.5 mg/mL), and colistin (0.1 mg/mL) on the relative abundance of gut microbes on the genus level in 6-month-old APP/PS1 transgenic model mice treated orally with 50 mpk GV-971 (n = 6-8). Colours indicate different genera. f, family.

**(g)** Effects of 50 mpk GV-971 on the brain Th1 cell frequency of antibiotic-treated 6-month-old

APP/PS1 mice (see Methods). Th1 cells ( $CD45^{\text{high}}CD4^+CXCR3^+$ ) are presented relative to  $CD45^{\text{high}}CD4^+$ T cells ( $n = 6-8$ ), and the data are presented as the mean  $\pm$  standard error of the mean (mean  $\pm$  sem). From left to right:  $*P = 0.0444$ ,  $*P = 0.0291$ ;  $P = 0.0650$  (NS),  $P = 0.0931$  (NS) by Student's t-test. NS, no significance.

**(h)** Effects of 50 mpk GV-971 on the relative density of IBA1-positive immune-fluorescent staining detected in hippocampal slices from antibiotic-treated 6-month-old APP/PS1 mice ( $n = 4-6$ , see Methods). The IBA1-positive area reflects the activation of microglial cells. The data are presented as the mean  $\pm$  standard error of the mean (mean  $\pm$  sem).  $***P < 0.0001$  by Student's t-test. NS, no significance.

**(i)** Representative immunofluorescence staining of IBA1 in the brain of APP/PS1 and GV-971 treated APP/PS1 mice with or without antibiotics. IBA1 was visualized using FITC conjugated secondary antibody shown as green. Nucleus were stained with DAPI shown as blue. Scale bar represent 250  $\mu\text{m}$ .

**(j)** Effects of GV-971 on cytokine levels in the brain homogenates of 8-month-old APP/PS1 mice as detected by a cytokine antibody array with and without antibiotics treatment ( $n = 5-6$ ). Colours in the heatmap indicate relative cytokine levels; red indicates cytokines that are upregulated, and blue indicates cytokines that are downregulated.
