# Supplementary material for: Sodium oligomannate therapeutically remodels gut microbiota and suppresses gut bacterial amino acids-shaped neuroinflammation to inhibit Alzheimer’s disease progression
Source: PubMed Central journal article supplement (PMC6796854; doi:10.1038/s41422-019-0216-x), 2019-09-06
Supplement: 41422_2019_216_MOESM5_ESM.pdf [file 41422_2019_216_MOESM5_ESM.pdf]

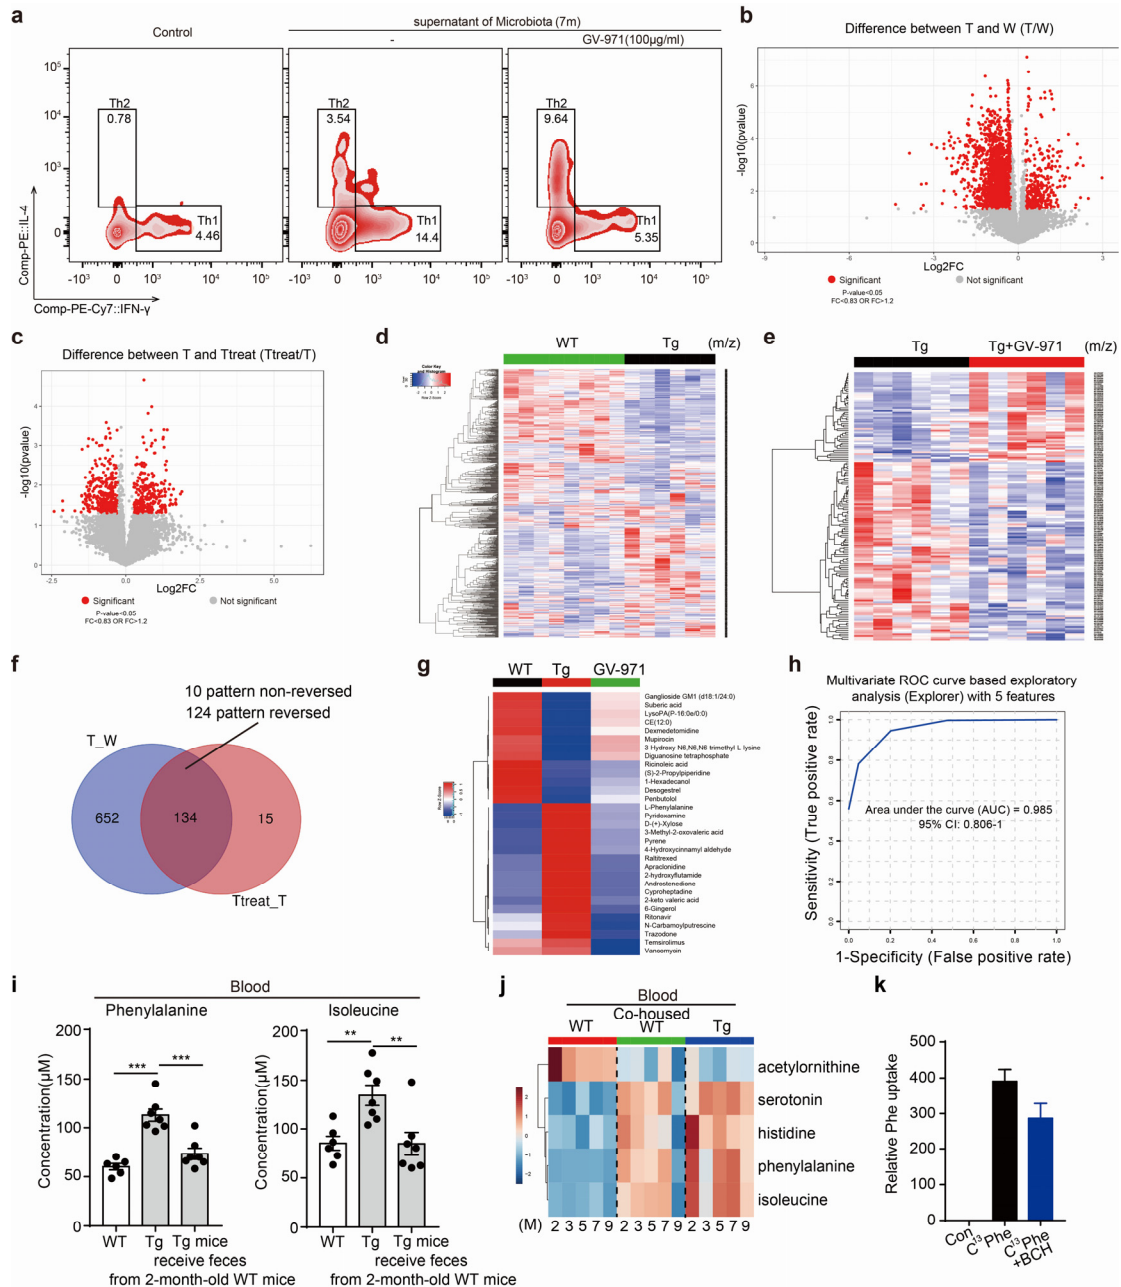

**Figure S5.**

**(a)** The effect of GV-971 treated bacteria supernatant on the differentiation of naïve CD4<sup>+</sup>T cells to Th1 and Th2 cells *in vitro*. Th1 (CD4<sup>+</sup>IFN-γ<sup>+</sup>) cells and Th2 (CD4<sup>+</sup>IL-4<sup>+</sup>) cells were gated by flow cytometry. The data are presented as the mean ± standard error of the mean (mean ± sem); n = 3 replicates per group, one of three replicated results was represented.

**(b-c)** The volcano plot depicts the fold change and *P*-value distribution of metabolites from the raw data of gut feces metabolomics of 7-month-old WT and 5XFAD (Tg) mice (n=6-8) (b) and 7-month-old 5XFAD (Tg) mice treated or not treated with 100 mpk GV-971 (n=6) (c). Red points indicate significant changing metabolites. Significance is defined as *P*-value < 0.05 of Student's t-test and a fold change (FC) of < 0.83 or > 1.2 between Tg (T) and wild type (W), or between Tg (T) (b) and Tg treated with GV-971 (T<sub>treat</sub>) (c). The x-axis shows log<sub>2</sub>FC, and the y-axis shows -log<sub>10</sub>*P*. T, 5XFAD (Tg) mice; W, wild type mice; T<sub>treat</sub>, 5XFAD mice treated with 100 mpk GV-971.

**(d-e)** Heatmap of seven hundred eighty-six metabolites that were differentially regulated between Tg and WT mice (d), as well as 149 metabolites between GV-971-treated and untreated Tg mice (e) (n=6-8). These metabolites were identified and annotated by aligning the molecular mass data (m/z) of the significant peaks with online METLIN database.

**(f)** The Venn diagram shows the commonly deregulated gut feces metabolites between Tg and WT mice (T<sub>W</sub>) and between GV-971-treated and untreated Tg mice (T<sub>treat</sub>\_T) (n=6-8). One hundred twenty-four metabolites had reversed patterns across the two comparisons, i.e., metabolites that are either both high in T versus W (T<sub>W</sub>) and low in T<sub>treat</sub> versus T (T<sub>treat</sub>\_T), or both low in T versus W (T<sub>W</sub>) and high in T<sub>treat</sub> versus T (T<sub>treat</sub>\_T). T, 5XFAD (Tg) mice; W, wild type mice; T<sub>treat</sub>, 5XFAD mice treated with 100 mpk GV-971.

**(g)** The heatmap shows 31 identified metabolites that were differentially regulated among the WT, Tg and 100 mpk GV-971-treated Tg groups (n=6-8) that could be matched to all three

databases (Human Metabolites Database (HMDB), METLIN, Kyoto Encyclopedia of Genes and Genomes (KEGG)). Red, upregulated; blue, downregulated.

**(h)** The receiver operating characteristic (ROC) curve analysis shows that the model containing the best 5 biomarkers had a strong diagnostic power (with an AUC of 0.985) in discriminating Tg from WT.

**(i)** Effects of faecal microbiome transplantation on blood phenylalanine and isoleucine levels. Feces of 2-month old WT mice were transplanted into 7-month old Tg mice (n = 6-7). For phenylalanine,  $***P = 0.0001$  (F (2, 17) = 26.59). For isoleucine,  $**P = 0.0065$  (Tg versus WT),  $**P = 0.0045$  (Tg receive feces versus Tg) by one-way ANOVA (F (2, 17) = 8.181).

**(j)** Levels of amino acid in the blood samples of WT, co-housed WT and Tg at various months (M) of ages. Red, upregulated; blue, downregulated.

**(k)** The uptake of phenylalanine by Th1 cells. Th1 cells were cultured with/without  $^{13}\text{C}$ -labelled phenylalanine (5 mM) for 0.5 h. Cells were collected for mass spectrum analysis to test the relative concentration of  $^{13}\text{C}$ -labelled phenylalanine. BCH, an inhibitor of system L amino acid transporters, was used as positive control. n = 3 per replicate.
